# Supplementary material for: Hyperglycemia Negatively Affects IPSC-Derived Myoblast Proliferation and Skeletal Muscle Regeneration and Function
Source: MDPI journal article supplement (doi:10.3390/cells11223674), 2022-11-18
Supplement: s1 [file s1]

# Hyperglycemia Negatively Affects iPSC-Derived Myoblast Proliferation and Skeletal Muscle Regeneration and Function

Agnes Badu-Mensah<sup>1,2</sup>, Paola Valinski<sup>2</sup>, Hemant Parsaud<sup>1</sup>, James J Hickman<sup>1,2,\*</sup>, Xiufang Guo<sup>1,2,\*</sup>

## Supplementary Materials

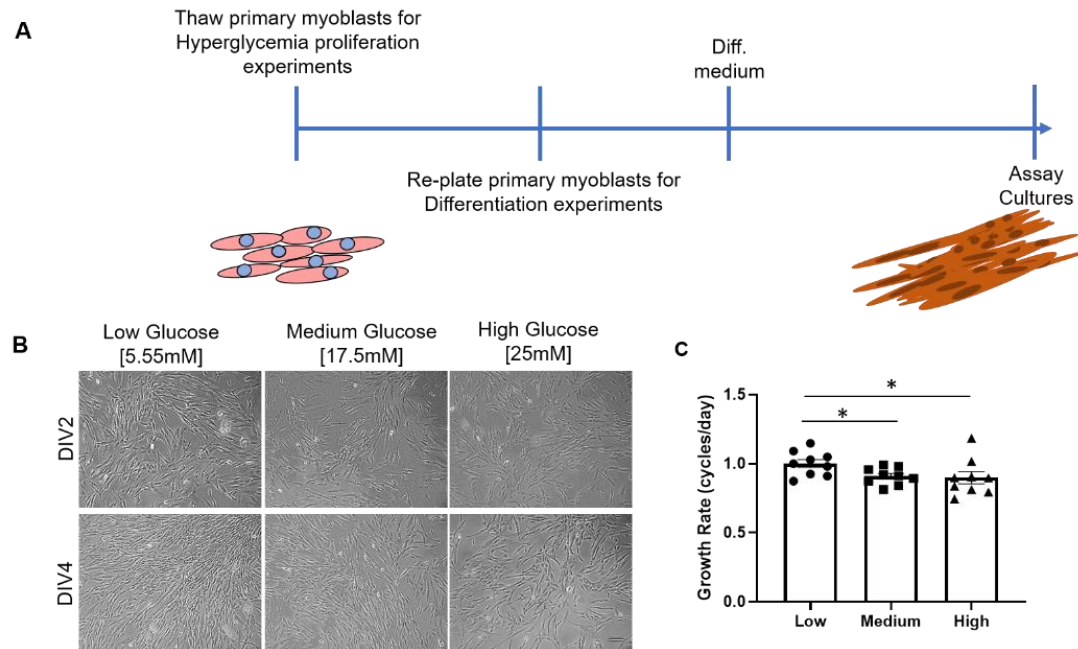

**Figure S1.** Effect of hyperglycemia on primary myoblast proliferation. **(A)** Illustration of primary myoblast culturing and differentiation timeline. **(B)** Phase images of primary myoblasts in 5.55 mM, 17.5 mM and 25 mM of glucose at days 2 and 4 of proliferation. **(C)** Graph showing primary myoblasts proliferation rate in varying glucose concentration. Scale bar = 100  $\mu$ m Error bars = SEM.  $P \leq 0.1$ , \*;  $P \leq 0.05$ , \*\*;  $P \leq 0.01$ , \*\*\*.  $N=3$ . Statistics was performed utilizing One-way ANOVA with post-hoc Tukey HSD Test by comparing between each hyperglycemia group with the euglycemic control group.

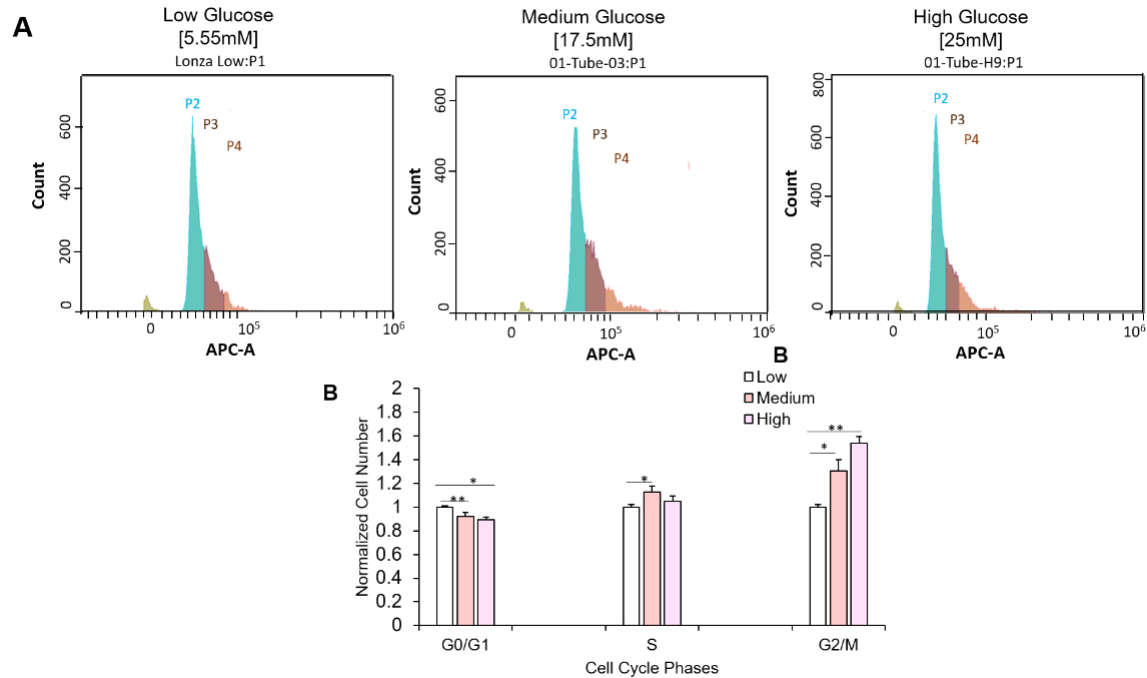

**Figure S2.** Effect of hyperglycemia on cell cycle progression. **(A)** Pictograph showing primary myoblasts distribution among the various cell cycle phase in each glucose concentration (P2, green: G0/G1 phase; P3, dark brown, S phase; P4, light brown, G2/M phase). **(B)** Quantification of primary myoblasts at the various phases of cell cycle in 5.55 mM, 17.5 mM and 25 mM of D-glucose conditions. Data was normalized to the cell count of each phase at euglycemic condition. Error bars = SEM.  $P \leq 0.1$ , \*,  $P \leq 0.05$ , \*\*,  $P \leq 0.01$ , \*\*\*,  $N=10$ . Statistics was performed utilizing One-way ANOVA with post-hoc Tukey HSD Test.

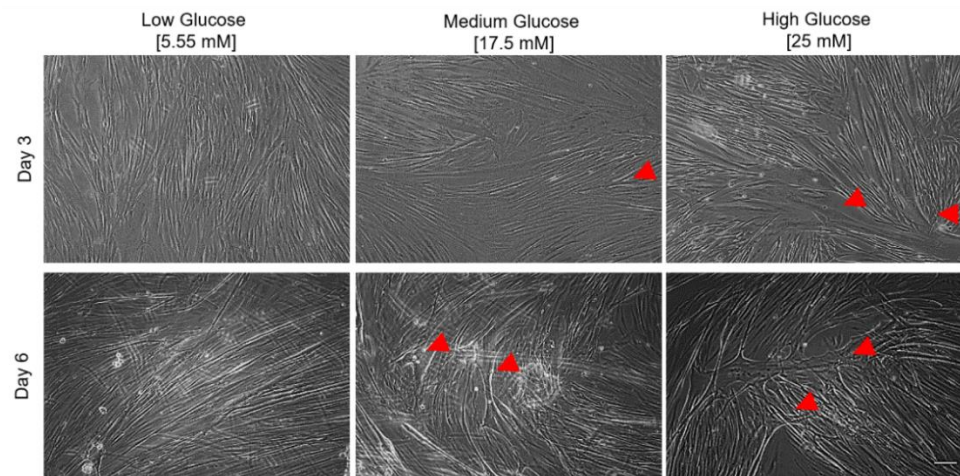

**Figure S3.** Phase contrast images of myotubes differentiated from adult-derived primary myoblasts previously expanded in varying D-glucose conditions concentration at days 3 and 6 of differentiation. Scale bar = 100  $\mu$ m. Red arrows pointing to branched hypertrophic myotubes.
